# Supplementary material for: Activity-Regulated Cytoskeleton-Associated Protein (Arc/Arg3.1) is Transiently Expressed after Heat Shock Stress and Suppresses Heat Shock Factor 1
Source: PubMed Central journal article supplement (PMC6385231; doi:10.1038/s41598-019-39292-1), 2019-02-22

## Supporting Information

Activity-Regulated Cytoskeleton-Associated Protein (Arc/Arg3.1) is Transiently  
Expressed after Heat Shock Stress and Suppresses Heat Shock Factor 1

A Young Park<sup>1\*</sup>, Yeon Seung Park<sup>1\*</sup>, Dami So<sup>1\*</sup>, In-Kang Song<sup>1</sup>, Jung-Eun Choi<sup>1</sup>,

Hee-Jung Kim<sup>1,2†</sup>, Kong-Joo Lee<sup>1†</sup>

\*These authors contributed equally to this work.

<sup>1</sup>College of Pharmacy and Graduate School of Pharmaceutical Sciences, Ewha  
Womans University, Seoul, Korea 03760

<sup>2</sup>Current address: Spark biopharma, #203-207A, Seoul National University, 1  
Gwanak-ro, Gwanak-gu, Seoul, Korea 08826

<sup>†</sup>Corresponding authors: Kong-Joo Lee, Tel: 82-2-3277-3038, Fax: 82-2-3277-3760,  
e-mail address: [kjl@ewha.ac.kr](mailto:kjl@ewha.ac.kr); Hee Jung Kim, [hjkim@sparkbio.co.kr](mailto:hjkim@sparkbio.co.kr)

# S Figure 1

**a**

| Definition                         | Transcript                  | Symbol | Heat shock |       |      |       |      |      |       |       | MG132 |       |       |       |      |       |       |       |
|------------------------------------|-----------------------------|--------|------------|-------|------|-------|------|------|-------|-------|-------|-------|-------|-------|------|-------|-------|-------|
|                                    |                             |        | RIF-1      |       |      |       | TR   |      |       |       | RIF-1 |       |       |       | TR   |       |       |       |
|                                    |                             |        | C          | 4 h   | 12 h | 24 h  | C    | 4 h  | 12 h  | 24 h  | C     | 2.5 h | 8 h   | 18 h  | C    | 2.5 h | 8h    | 18h   |
| Arc/ARG3.1                         | <a href="#">NM_018790.1</a> | Arc    | 1.00       | 37.9  | 88.8 | 12.6  | 1.00 | 38.0 | 1.57  | -1.34 | 1.00  | 2.80  | -1.12 | -1.38 | 1.00 | 1.59  | -1.19 | 1.07  |
| early growth response 1 (Egr1)     | <a href="#">NM_007913.2</a> | Egr1   | 1.00       | 5.00  | 7.27 | 2.80  | 1.00 | 3.64 | -1.22 | -1.27 | 1.00  | -4.67 | -2.51 | -1.77 | 1.00 | -6.41 | -3.02 | -1.72 |
| FBJ osteosarcoma oncogene (Fos)    | <a href="#">NM_010234.2</a> | Fos    | 1.00       | 2.70  | 7.89 | 1.96  | 1.00 | 5.42 | -1.52 | -1.37 | 1.00  | 1.48  | -1.14 | -1.08 | 1.00 | 1.33  | -1.21 | -1.03 |
| FBJ osteosarcoma oncogene B (Fosb) | <a href="#">NM_008036</a>   | Fosb   | 1.00       | 1.38  | 5.10 | 1.48  | 1.00 | 4.72 | -1.01 | -1.10 | 1.00  | -1.13 | 1.02  | 1.11  | 1.00 | -1.39 | -1.15 | -1.42 |
| Jun oncogene (Jun)                 | <a href="#">NM_010591.1</a> | Jun    | 1.00       | 1.72  | 2.06 | -1.60 | 1.00 | 2.61 | 1.09  | -1.22 | 1.00  | -1.43 | -1.81 | -2.28 | 1.00 | -1.69 | -1.49 | -2.13 |
| Jun-B oncogene (Junb)              | <a href="#">NM_008416.1</a> | Junb   | 1.00       | -1.25 | 3.70 | 1.15  | 1.00 | 7.01 | 1.30  | 2.07  | 1.00  | 1.38  | -1.04 | 1.11  | 1.00 | 1.70  | -1.35 | -1.12 |

**b**

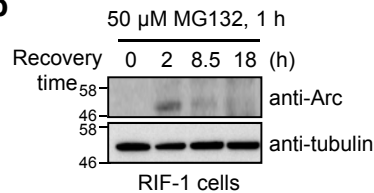

**Supplementary Figure 1.** (a) Gene list of immediate early genes (IEGs) induced by heat shock at 45°C for 30 min and recovered at 37°C for indicated times and by 50  $\mu$ M MG132 treatment for 1 h in RIF-1 and TR cells compared to control cells. The results were extracted from microarray analysis obtained from previous results (Kim, H. J. et al. *PLoS One*. 6, e20252 (2011)). (b) RIF-1 cells were treated with 50  $\mu$ M MG132 for 1 h as done in Figure 2a-c. Cells were recovered for the indicated times with fresh media. Arc/Arg3.1 was analyzed by Western analysis using anti-Arc/Arg3.1 antibody. As loading controls, tubulin levels were detected using anti-tubulin antibody.

## S Figure 2

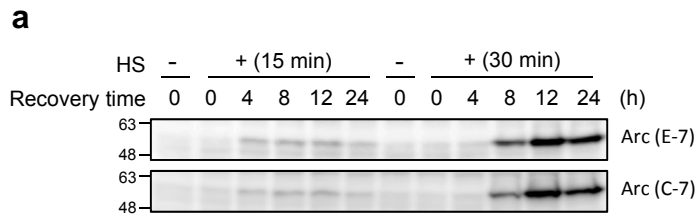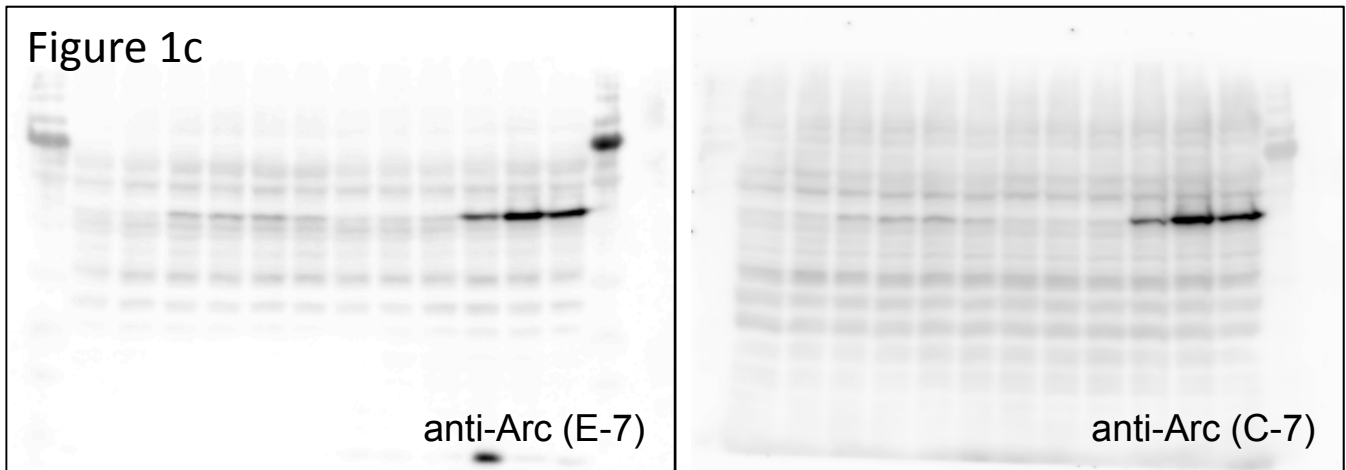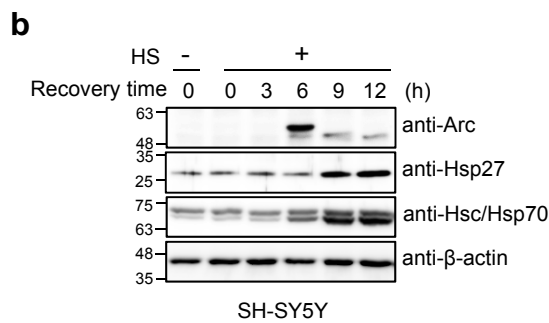

**Supplementary Figure 2. (a) Detection of Arc/Arg3.1 with different antibodies against Arc/Arg3.1.** HEK293T cells were exposed to heat shock at 45°C for 15 and 30 min, and recovered at 37°C for various times as shown in Figure 1c. Arc/Arg3.1 in same samples were detected with Western analysis using different antibodies (Santa Cruz, anti-Arc, E-7 and C-7). Bottom panel is the whole image of Western blot. No discernible differences between these two antibodies were detected. (b) Neuroblastoma SH-SY5Y cells were exposed to heat shock at 45°C for 20 min and recovered at 37°C for the indicated times. Arc/Arg3.1, Hsc/Hsp70 and Hsp27 were detected by Western blot analysis with their specific antibodies. As loading controls, β actin levels were detected using anti-β actin antibody.

## S Figure 3

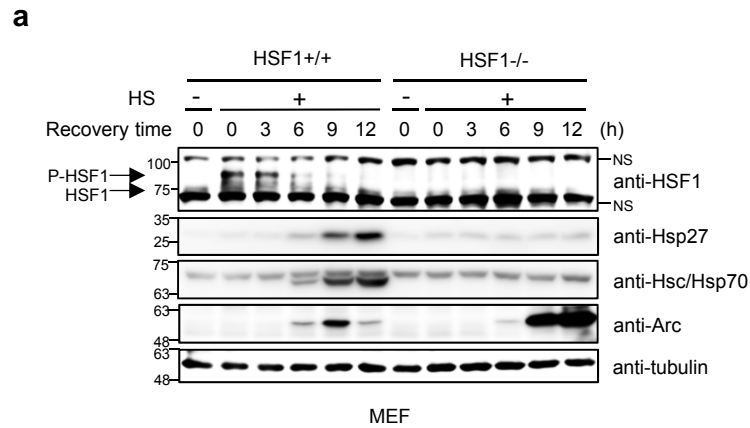

**b**

ARC\_1 promoter sequence (chr8:142614467-142614526)  
: ccacgggcctcgctggctgcataaagagccggcgccaggactcagcgcagagctcgggc

HSE consensus sequence:  
nTTCnnGAAnnTTCn

**Supplementary Figure 3. (a) HSF1 does not affect the expression of Arc/Arg3.1 in response to heat shock.** MEF WT cells and MEF cells knocking down HSF1 were exposed to heat shock at 45°C for 20 min and recovered at 37°C for the indicated times. HSF1, Arc/Arg3.1, Hsp27 and Hsc/Hsp70 were detected by Western blot analysis with their specific antibodies. As a loading control, tubulin level was detected using anti-tubulin antibody. NS; non-specific band. **(b) There are no similar sequence of HSEs (heat shock elements) in the ARC promoter region.** Bioinformatics analysis was performed by comparing the sequences of Arc promoter region with heat shock element (HSE), which were provided by GeneCards and EPDnew (the Eukaryotic Promoter Database).

## S Figure 4

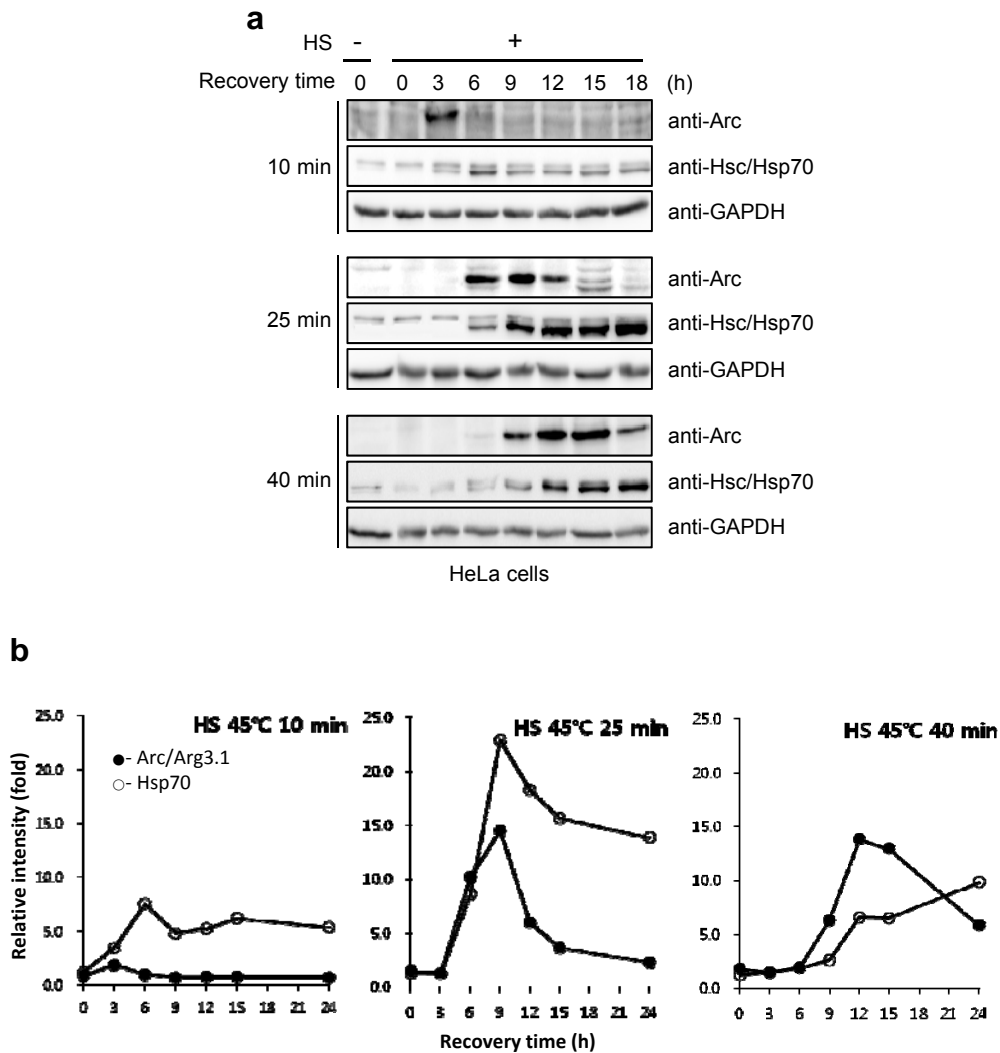

**Supplementary Figure 4.** HeLa cells were exposed to heat shock at 45°C for 10, 25, and 40 min and recovered for the indicated times in fresh media. Arc/Arg3.1 and Hsc/Hsp70 were detected by Western blot analysis with their specific antibodies. As a loading control, GAPDH level was detected using anti-GAPDH antibody. Arc/Arg3.1 and Hsc70/Hsp70 bands were quantified and normalized to the amount of GAPDH and showed graphs.

## S Figure 5

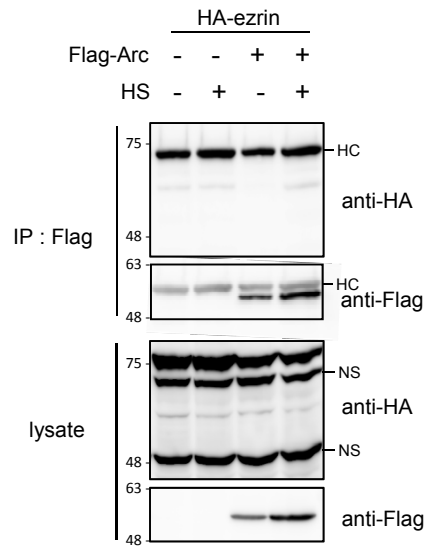

**Supplementary Figure 5. HA-ezrin did not bind to Flag-Arc.** HEK293T cells were transfected with HA-ezrin and Flag empty vector or Flag-Arc. After exposure to heat shock at 45°C for 15 min, immunoprecipitation was performed using anti-Flag antibody as done in Figure 4A. Protein complex was analyzed by Western analysis using anti-HA and anti-Flag antibodies. HC; antibody heavy chain, NS; non-specific band.

## S Figure 6

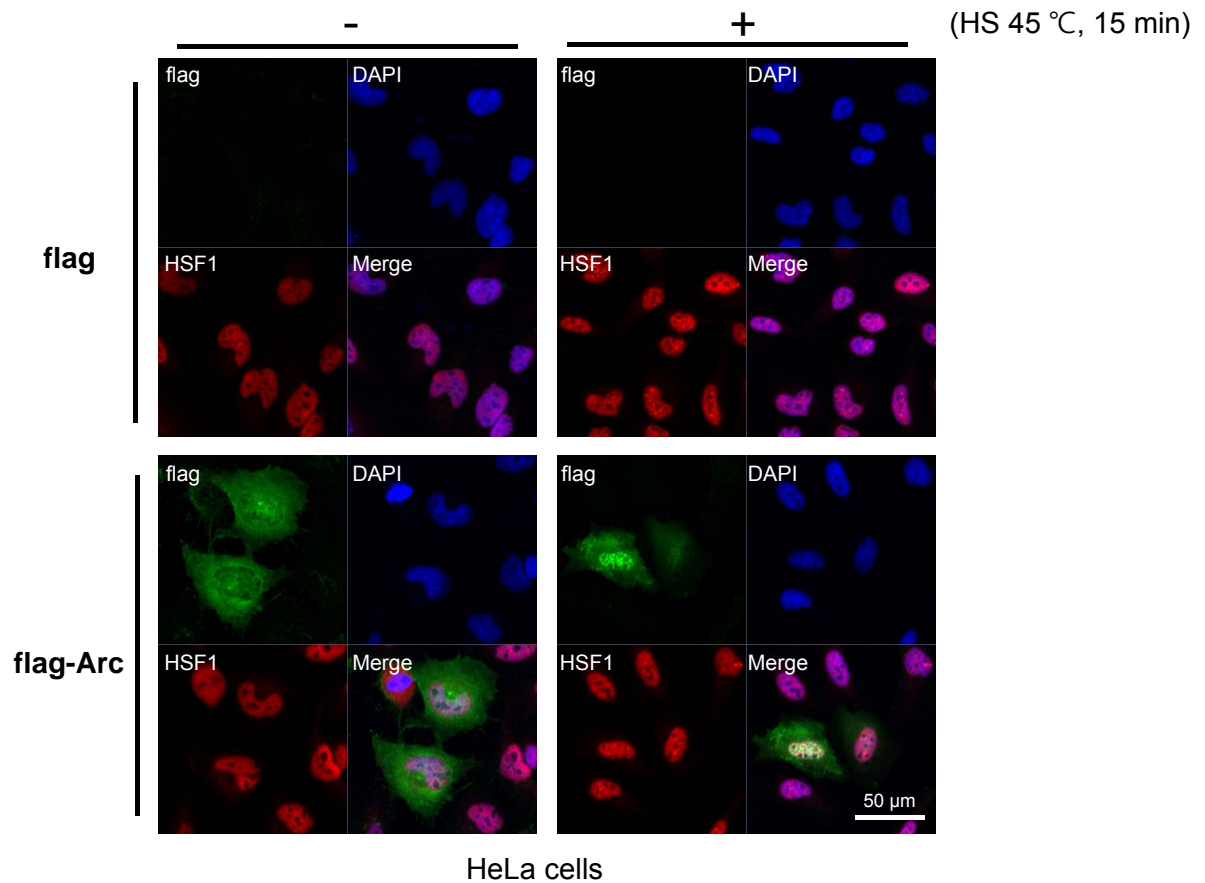

**Supplementary Figure 6.** HeLa cells were plated on the glass coverslip 24 h before transfection. Cells were then transfected with Flag or Flag-Arc. After 24 h, cells were treated with heat shock at 45°C for 15 min and visualized Flag-Arc (green), HSF1 (red) and nucleus (blue) under confocal microscopy. All of the Western blot results were selected representative data from more than duplicated results.

## S Figure 7

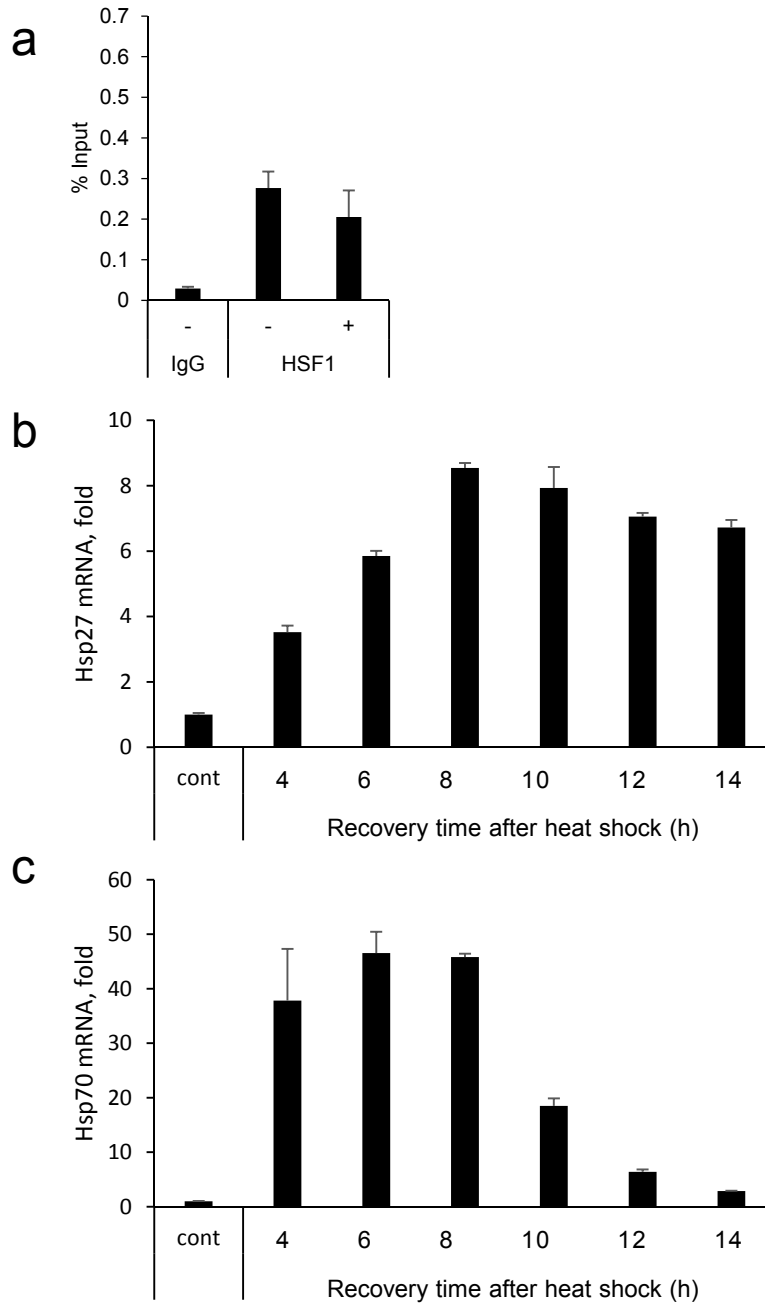

### Supplementary Figure 7. HSF1 did not bind to the HSE of *hsp27* immediately after heat shock.

(a) Cells were exposed to heat shock at 45°C for 15 min and crosslinked with formaldehyde.

Chromatin immunoprecipitation using rabbit IgG or anti-HSF1 antibody was performed.

Immunoprecipitated HSE region was quantified using quantitative real-time PCR using primers

forward, 5'-CAACCTGTCTGGCTCTGTCC-3'; reverse, 5'-GGCAATGACCCGTTTGAGG-3'.

(b, c) HEK293T cells were heat shock treated at 45°C for 15 min and recovered for the indicated times

at 37 °C. *hsp27* mRNA (b) and *Hsp70* mRNA (c) were analyzed using RT-qPCR.



## S Figure 8

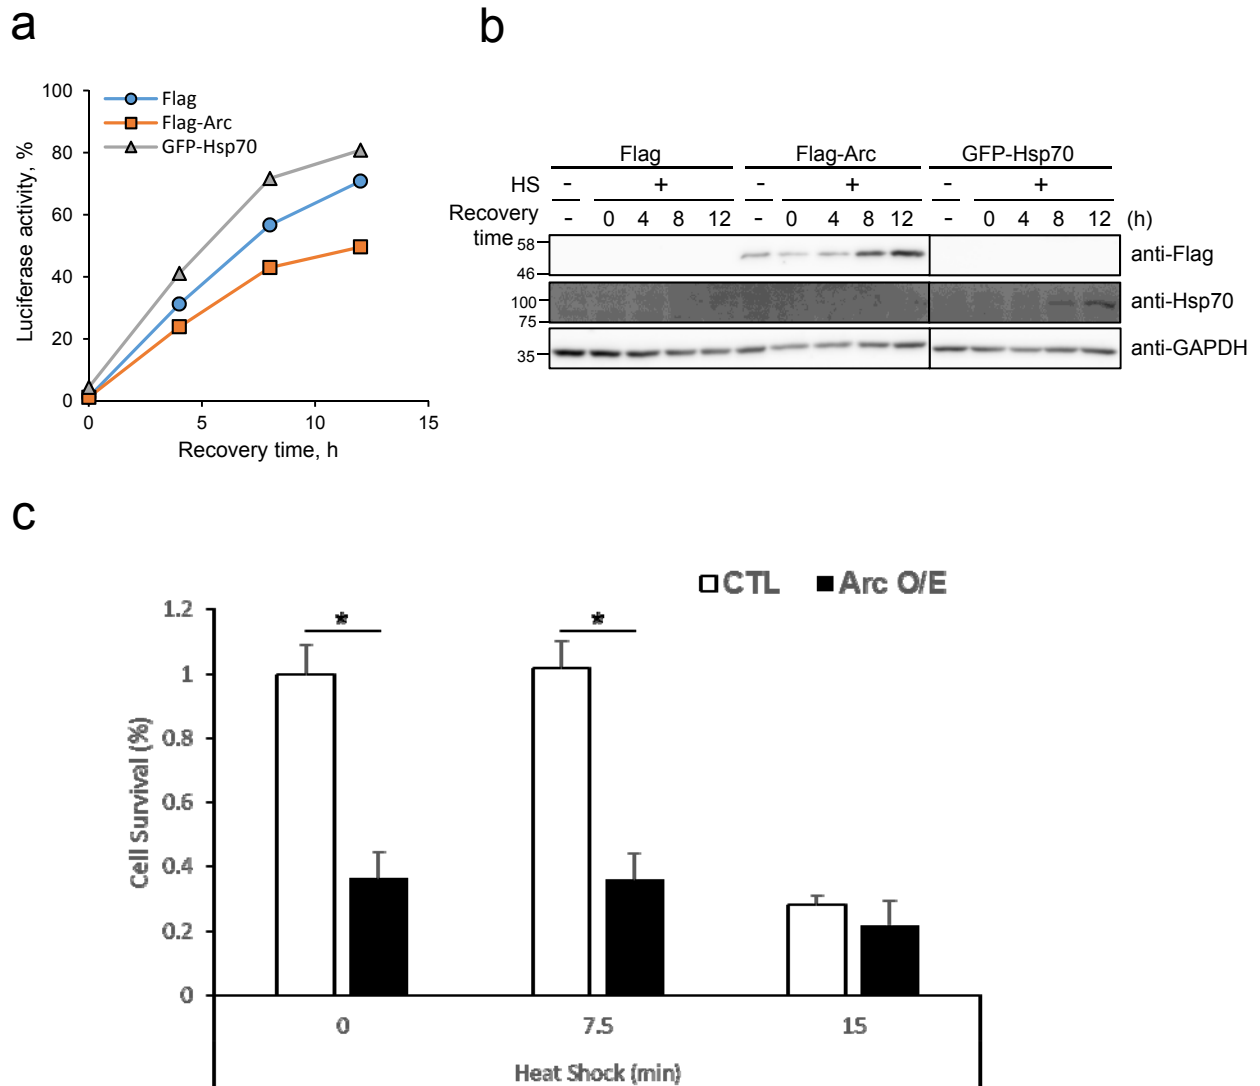

**Supplementary Figure 8.** (a) Arc/Arg3.1 interferes cellular chaperone activity. HEK293T cells were transfected with pCytLuc (encoding cytosolic luciferase) together with Flag, Flag-Arc or GFP-Hsp70 vectors. After pretreatment with cycloheximide (20  $\mu\text{g}/\text{mL}$ ) for 30 min, luciferase was inactivated by heating the cells at 45°C for 15 min. During a subsequent recovery period at 37°C, luciferase activity at each time point was measured. (b) Overexpression of Flag-Arc and GFP-Hsp70 was confirmed by Western analysis. (c) HEK293T cells transfected with Flag empty vector or Flag-hArc vector were exposed to heat shock at 45°C for indicated times. Cells were plated in 96-well plate, incubated at 37°C for 1 day, and cell survival was measured using WST-1 proliferation assay. Data were presented as the means  $\pm$  S.D. of triplicated experiments (t-test; \* $P < 0.05$ ).

S Figure 9

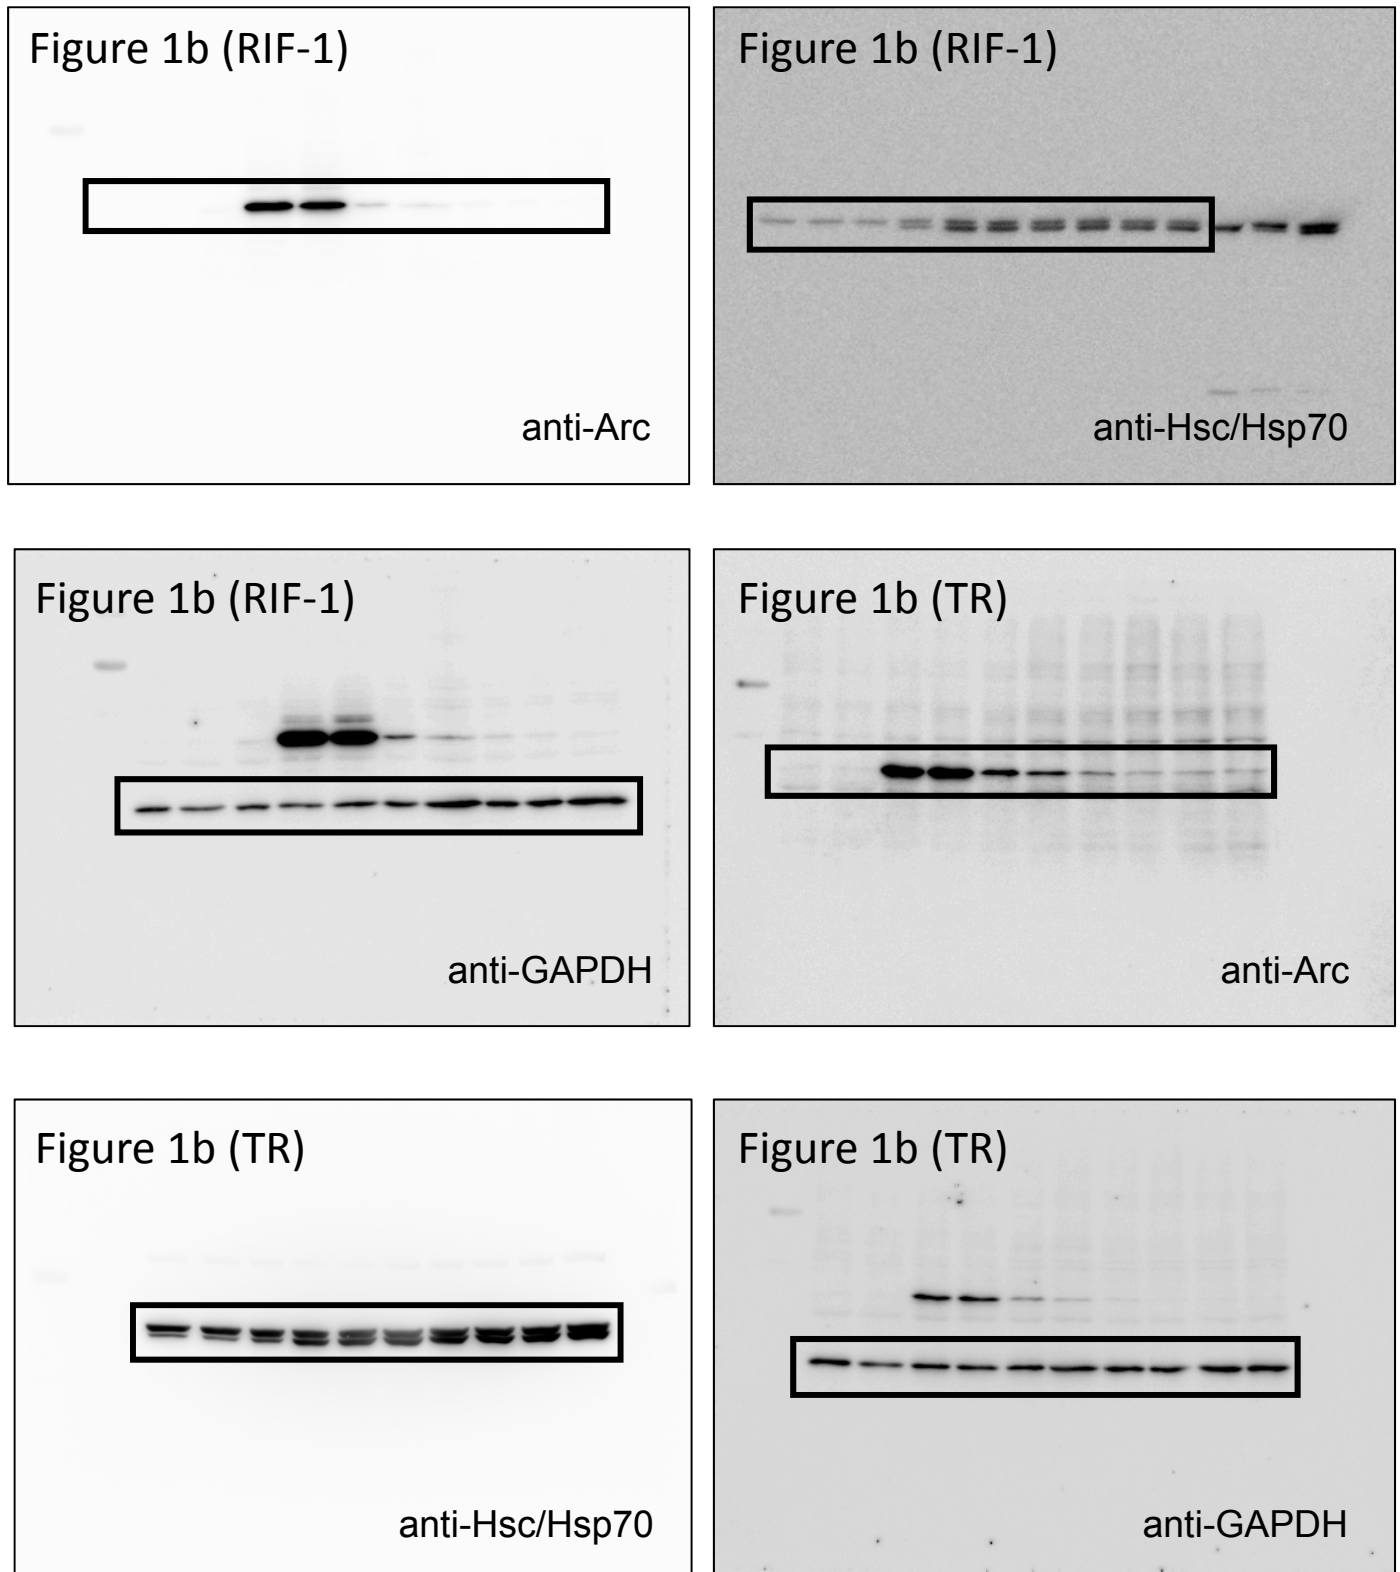

Supplementary Figure 8. Full size gels used in Figure 1-4.

S Figure 9

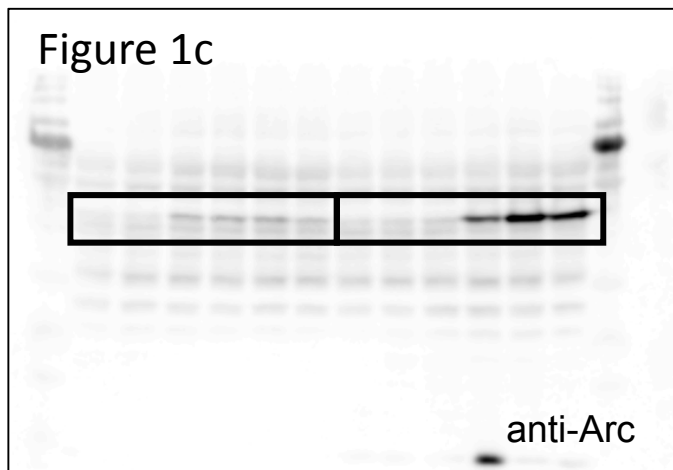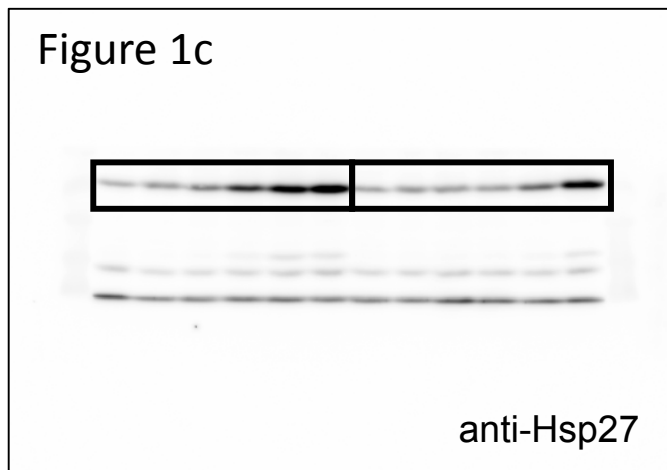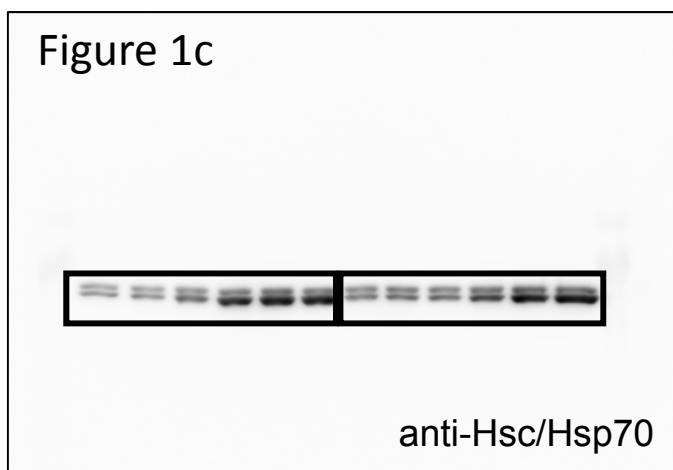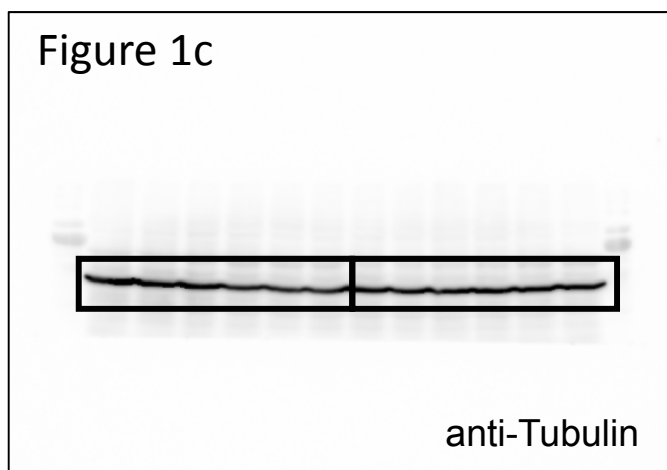

**Supplementary Figure 8.** Full size gels used in Figure 1-4.

S Figure 9

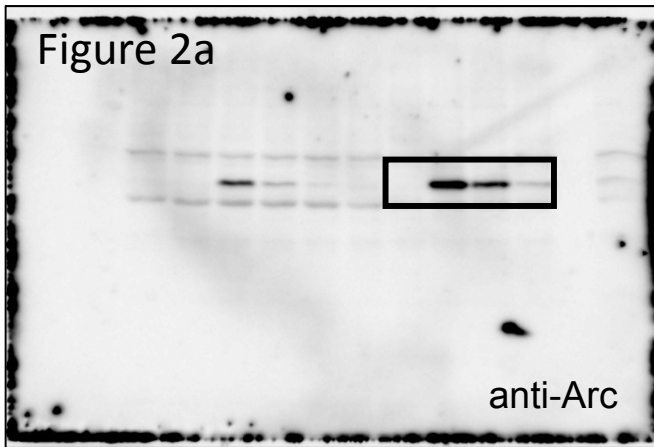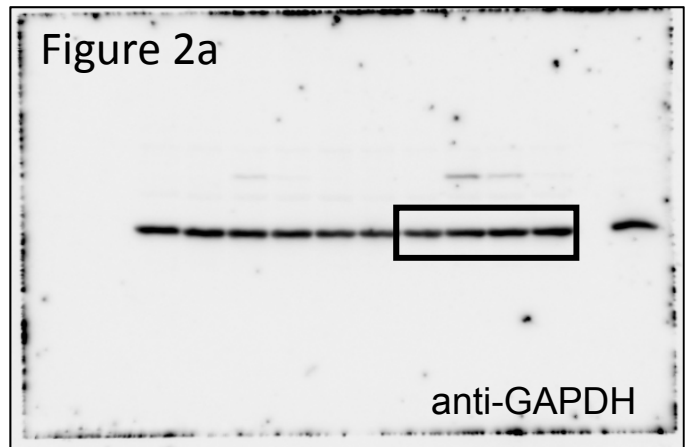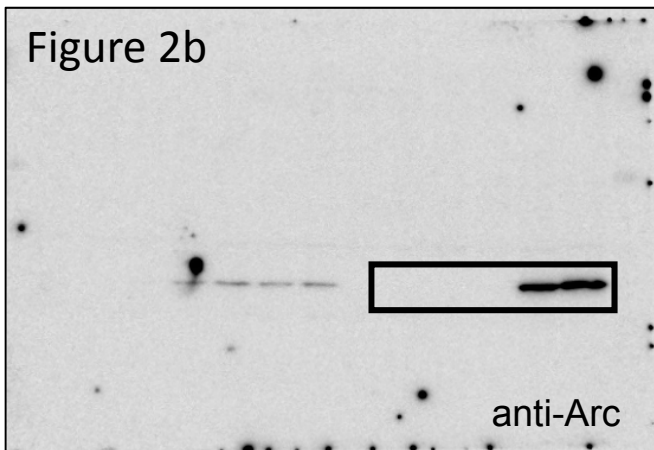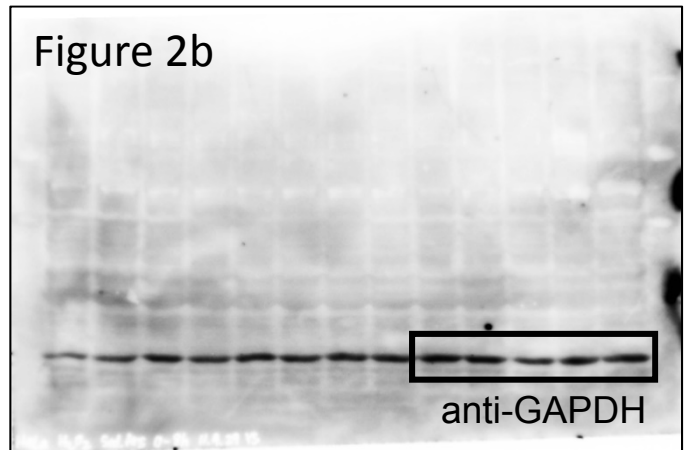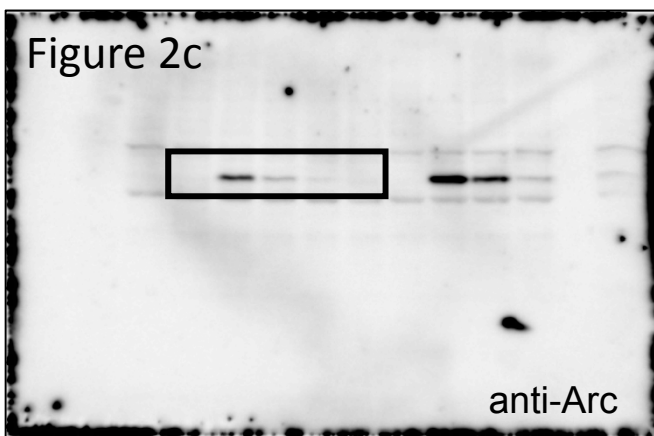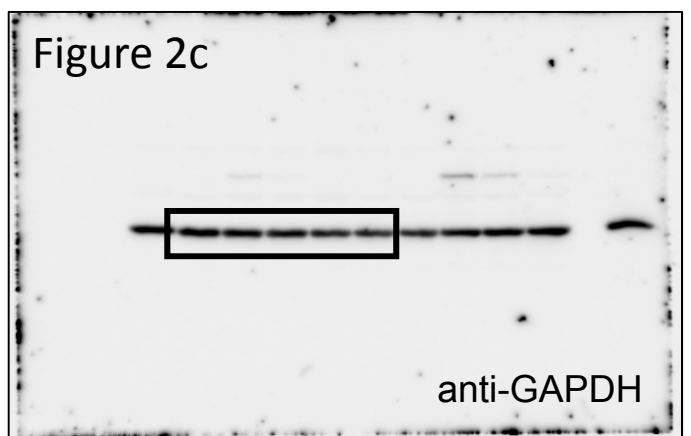

Supplementary Figure 8. Full size gels used in Figure 1-4.

S Figure 9

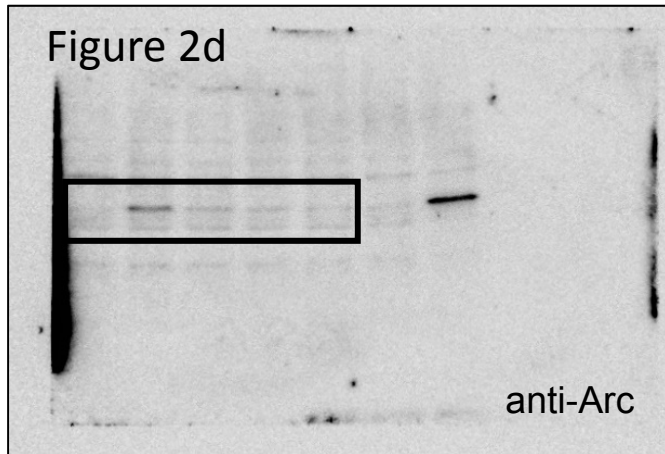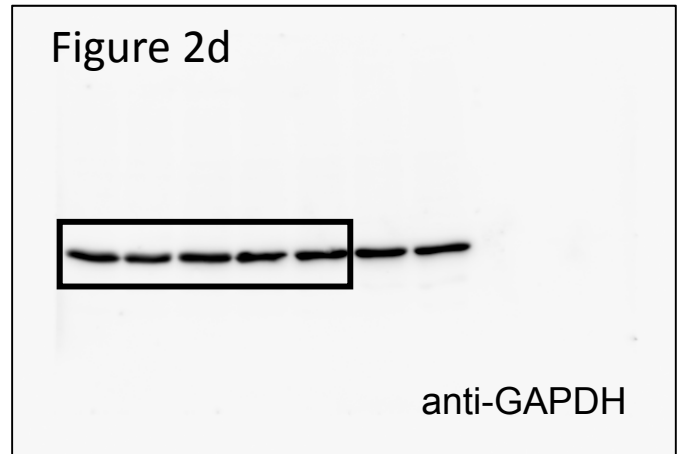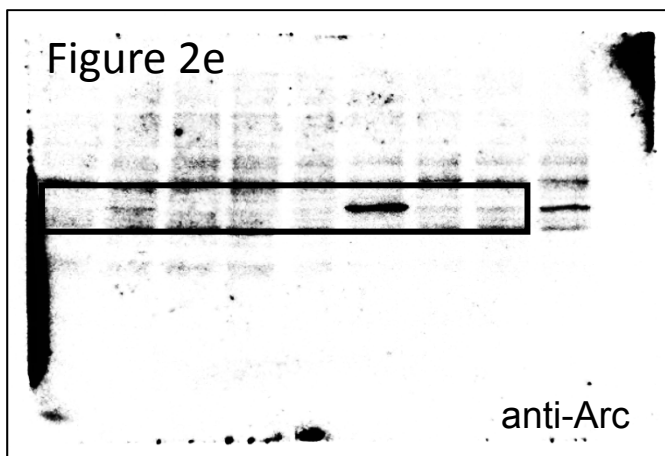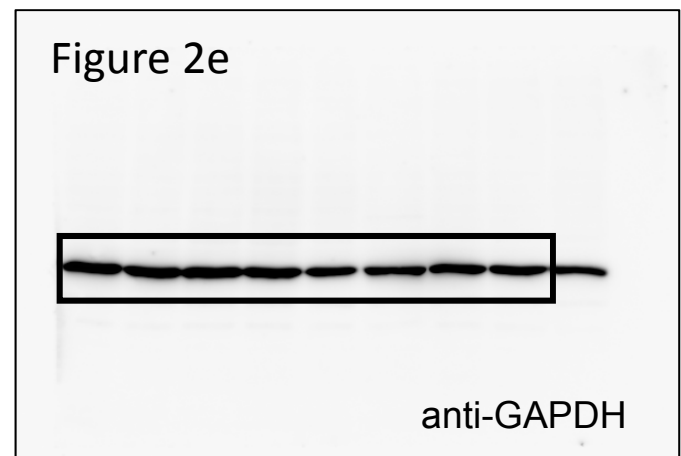

Supplementary Figure 8. Full size gels used in Figure 1-4.

S Figure 9

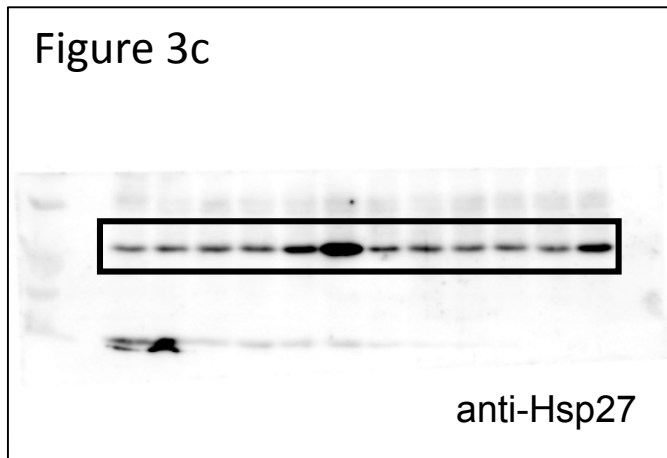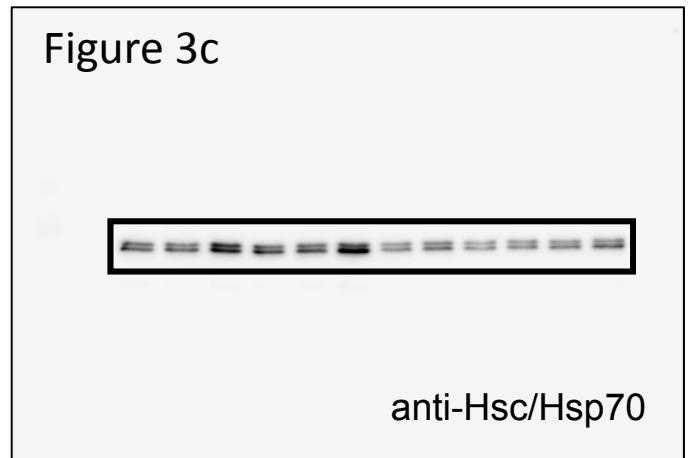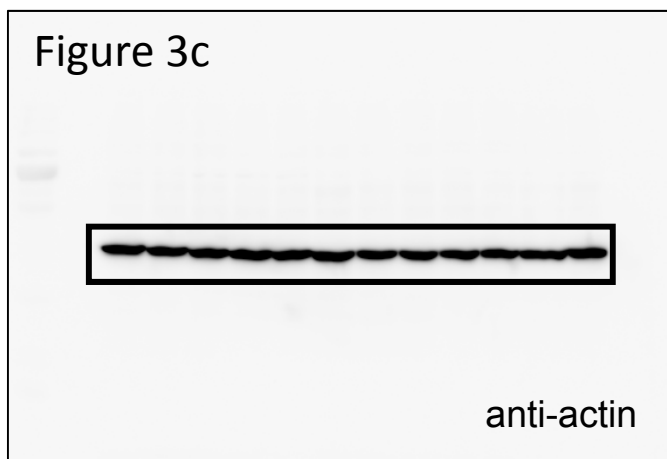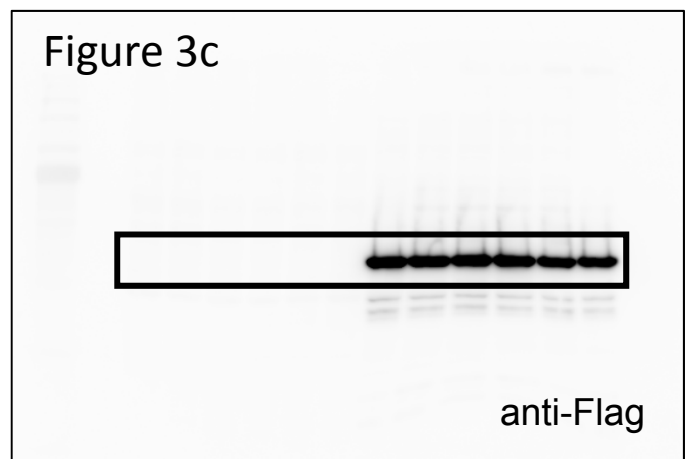

**Supplementary Figure 8.** Full size gels used in Figure 1-4.

S Figure 9

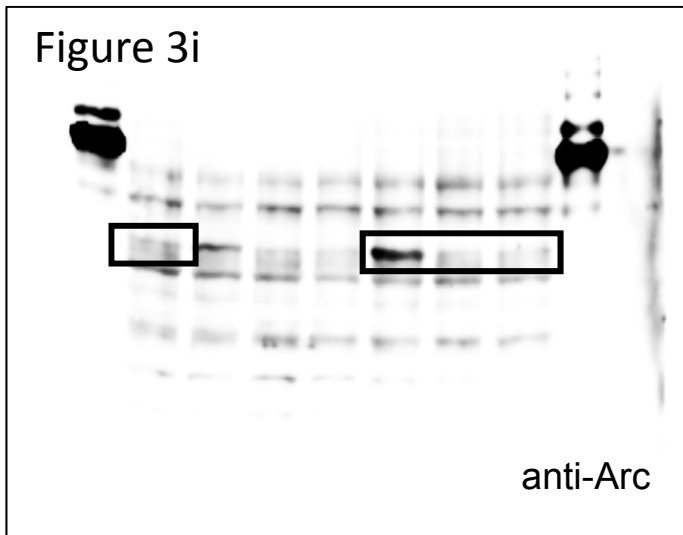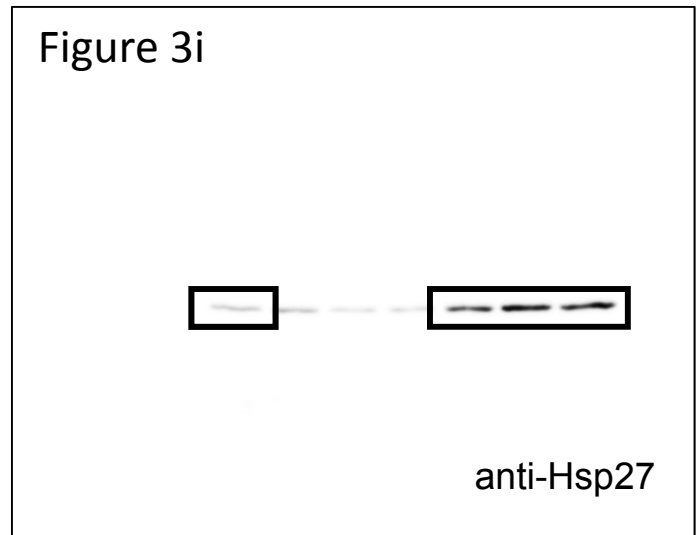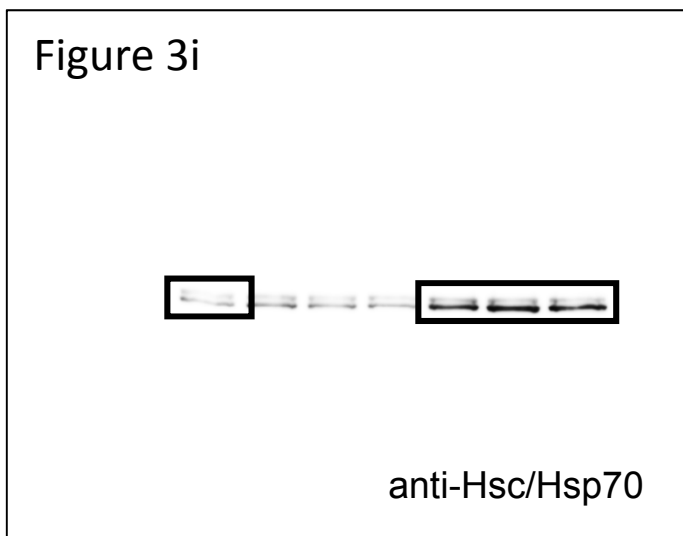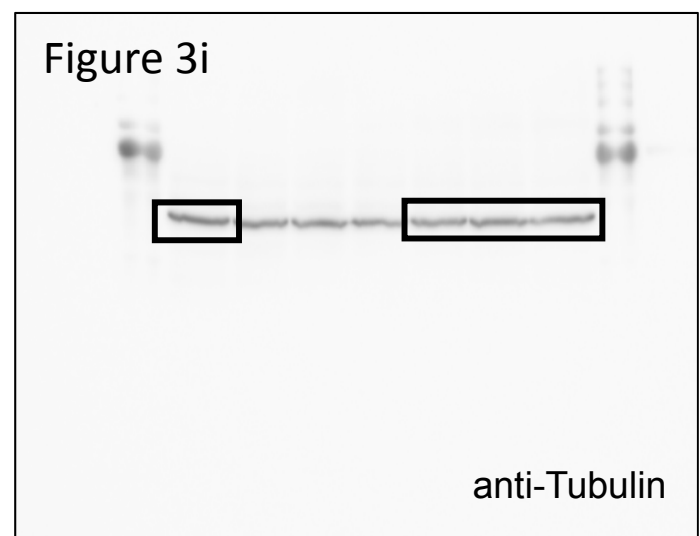

**Supplementary Figure 8.** Full size gels used in Figure 1-4.

S Figure 9

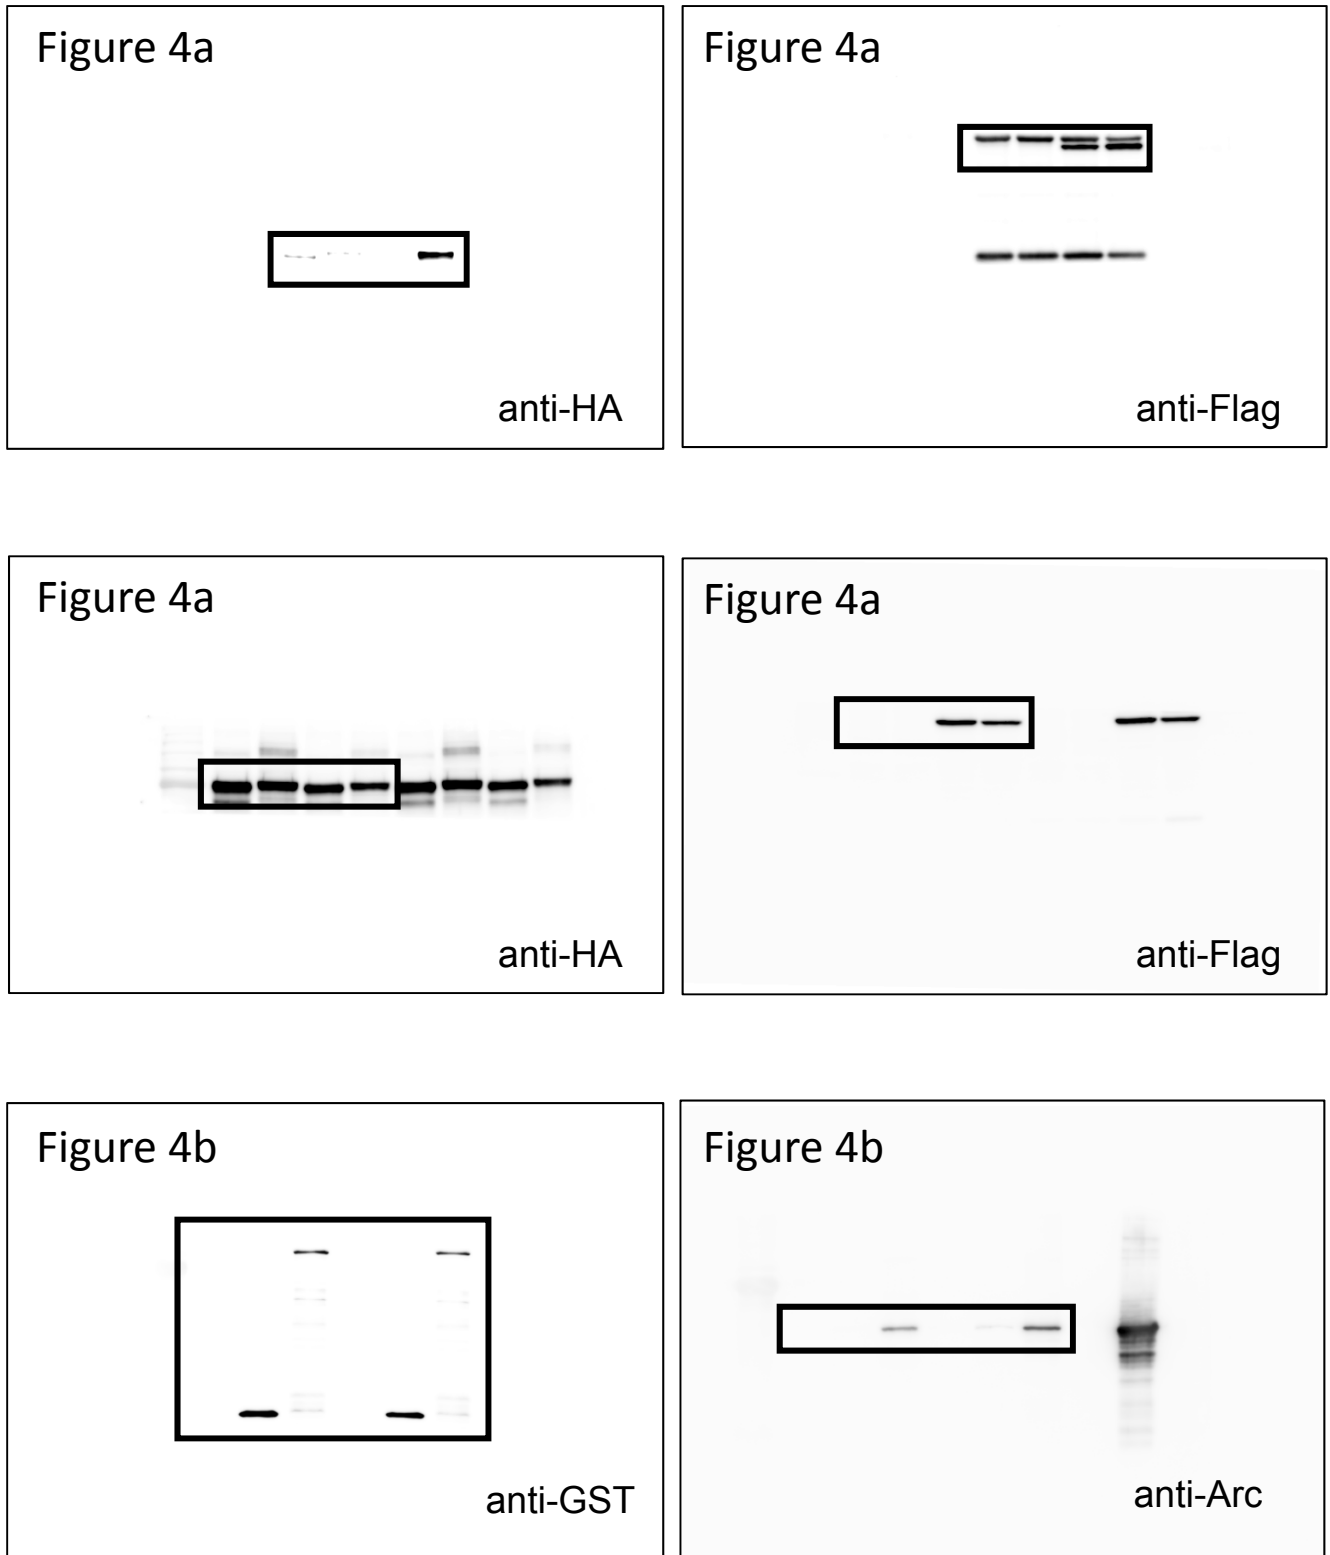

**Supplementary Figure 8.** Full size gels used in Figure 1-4.



S Figure 9

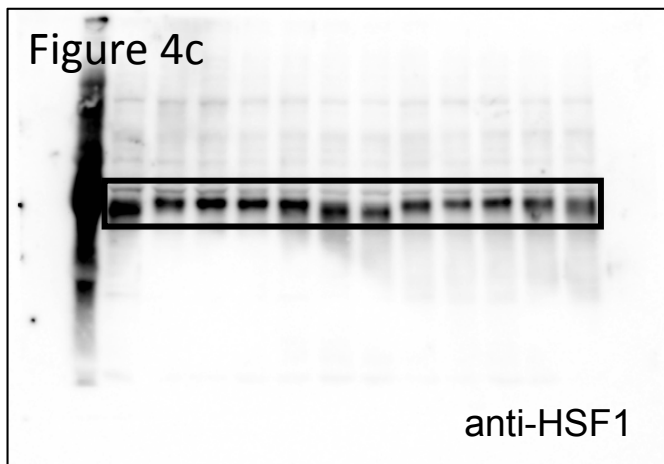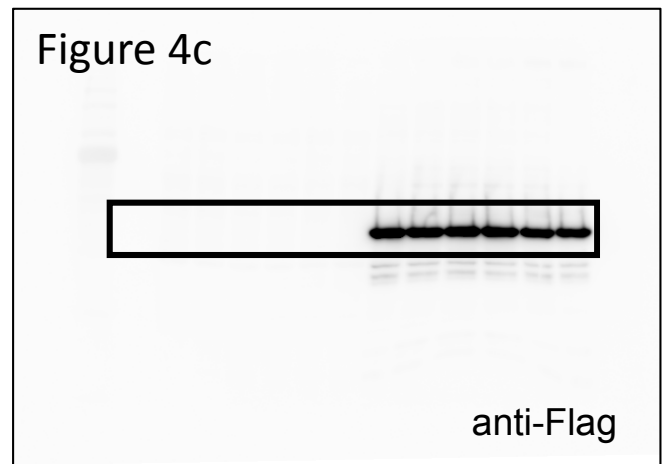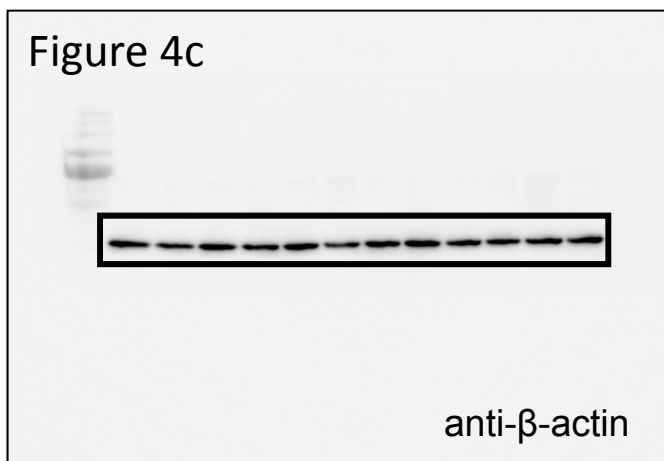

**Supplementary Figure 8.** Full size gels used in Figure 1-4.

S Figure 9

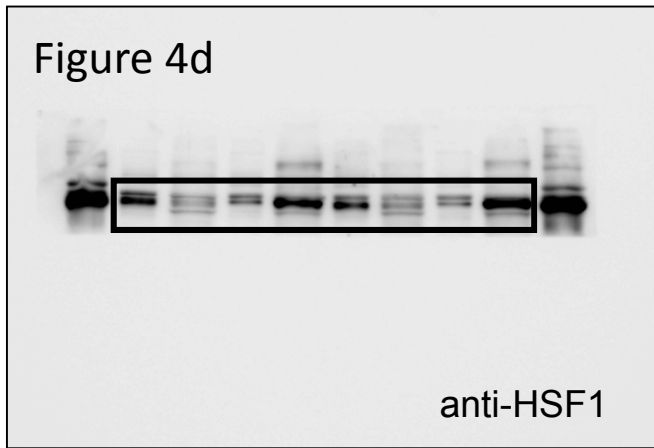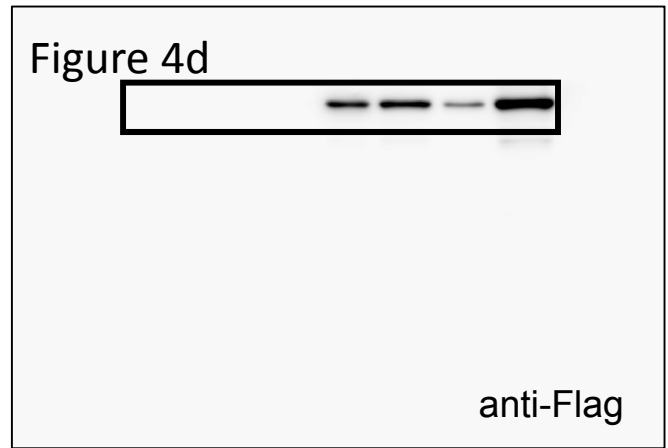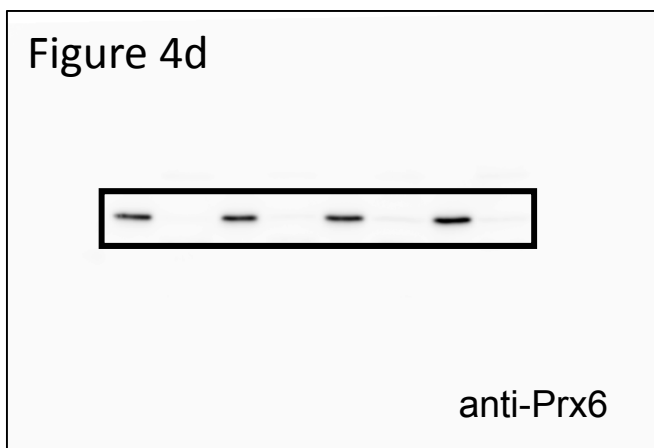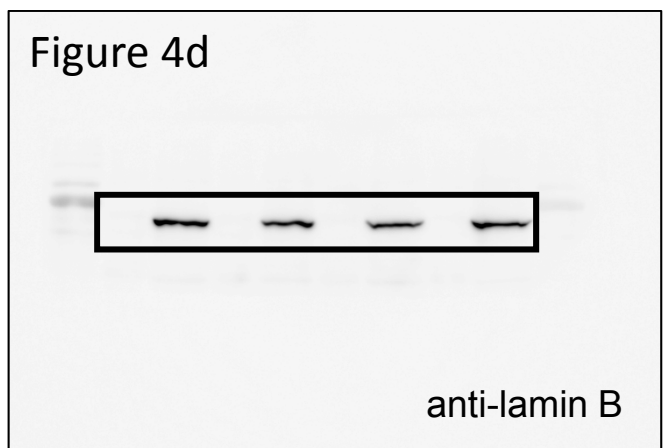

Supplementary Figure 8. Full size gels used in Figure 1-4.

S Figure 9

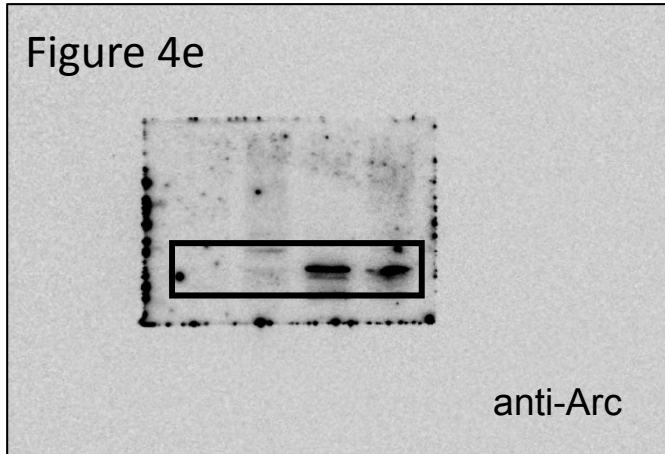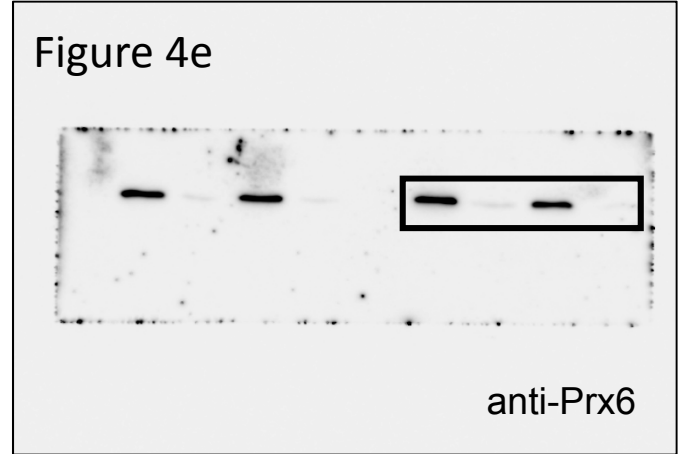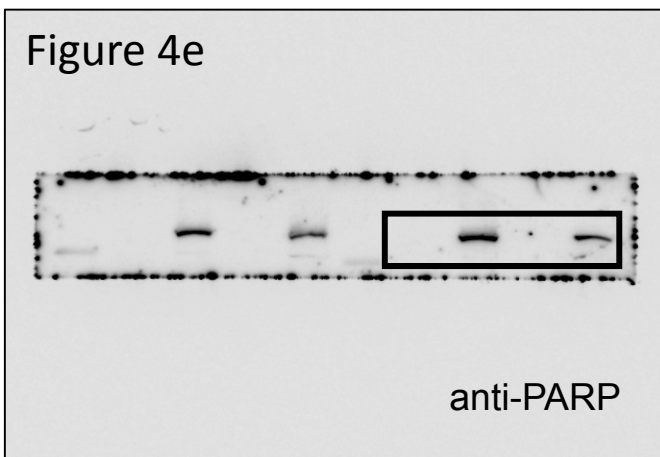

Supplement: 41598_2019_39292_MOESM1_ESM.pdf [file 41598_2019_39292_MOESM1_ESM.pdf]
